# Supplementary material for: Ultra-stretchable and shape-memorable ability of an output-boosted triboelectric nanogenerator utilizing highly ordered microdome-crowning thermoplastic polyurethane for a finger-motion detection sensor
Source: Royal Society of Chemistry journal article supplement (doi:10.1039/d3ma00534h), 2023-01-01
Supplement: d3ma00534h1.pdf [file d3ma00534h1.pdf]

## Supporting Information

# Ultra-Stretchable and Shape-Memorable Output-Boosted Triboelectric Nanogenerator Utilizing Highly Ordered Microdome-Crowning Thermoplastic Polyurethane for Finger-Motion Detection Sensor

*Ngoc Mai Chau,<sup>1,3</sup> Phuong Mai Tran,<sup>2,3</sup> Thu Ha Le,<sup>1,3</sup> Thi Thai Ha La,<sup>\*,1,3</sup> Van-Tien Bui<sup>\*,1,3</sup>*

<sup>1</sup>Department of Polymer Materials, Faculty of Materials Technology, Ho Chi Minh City University of Technology (HCMUT), 268 Ly Thuong Kiet Street, District 10, Ho Chi Minh City 700000, Vietnam

<sup>2</sup>Faculty of Environment and Natural Resources, , Ho Chi Minh City University of Technology (HCMUT) ), 268 Ly Thuong Kiet Street, District 10, Ho Chi Minh City 700000, Vietnam

<sup>3</sup>Vietnam National University Ho Chi Minh City, Linh Trung Ward, Thu Duc District, Ho Chi Minh City 700000, Vietnam

**Corresponding authors:** [tienbv@hcmut.edu.vn](mailto:tienbv@hcmut.edu.vn) (V.-T. Bui);

[lathaihapolyme@hcmut.edu.vn](mailto:lathaihapolyme@hcmut.edu.vn) (T.T.H. La)

**KEYWORDS:** *polyurethane; surface patterning; microdome arrays; stretchable, IPS.*

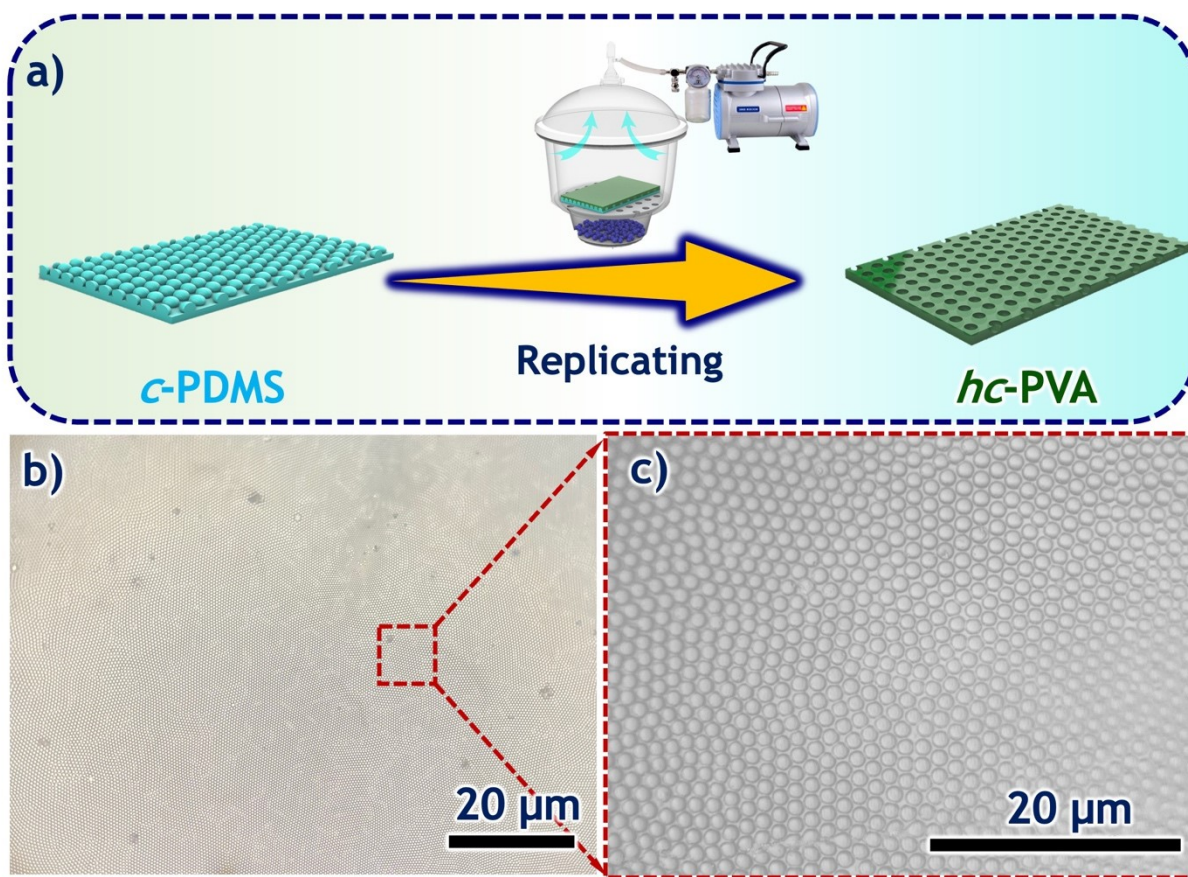

**Figure S1.** Fabrication of *hc*-PVA master mold. (a) Fabricating procedure of *hc*-PVA master mold. (b-c) Optical microscopy image of *hc*-PVA master mold.

The fabrication of *hc*-PVA mold was implemented using the Improved Phase Separation technique (IPS) and molding replica. First, honeycomb concave structured polyimide (*hc*-PI) was prepared through 2-stage process: spin-coating the PI solution 5 wt. % in chloroform onto a copper substrate with the speed of 600 rpm to produce a flat surface, and then dip-coating it into a pair of chloroform/methanol mixture for 5 s to carry out IPS process in the ambient environment [24]. In the next stage, PDMS was carefully casted onto the surface of *hc*-PI with degassing technique to remove bubbles and replicate the exact counterpart of *hc*-PI [23]. Similarly, the PVA solution 12 wt. % in distilled water was drop-cast onto the convex PDMS, then putting into the vacuum desiccator in 10 min before exposing to the normal air for natural drying in 2 days (**Figure S1a**). The *hc*-PVA morphology can be observed in **Figure S1b-c**.

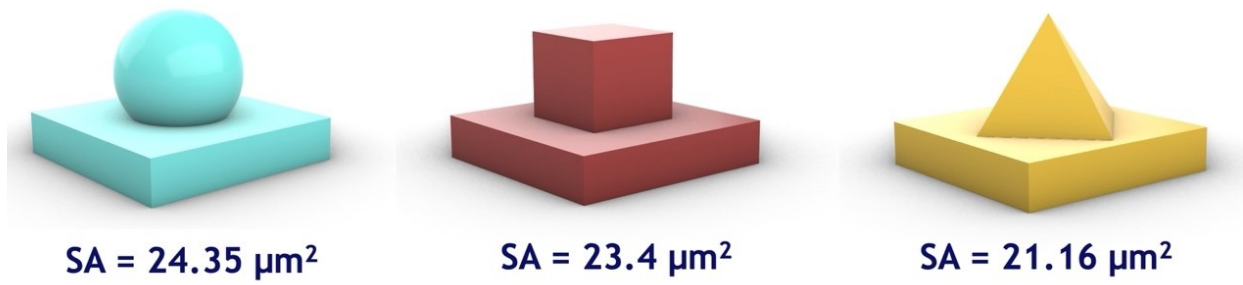

**Figure S2.** Enhancement in effective contact surface area among various pattern features: microdome, cube and pyramid. The surface area values were calculated using similar pattern height (2.5  $\mu\text{m}$ ) and projected width (2  $\mu\text{m}$ ) by Rhino software version 7.0.

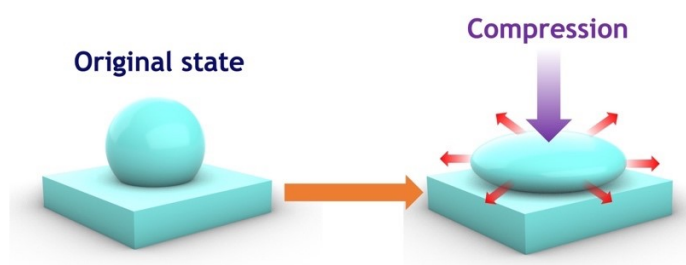

**Figure S3.** Multi-direction lateral deformation of microdome.

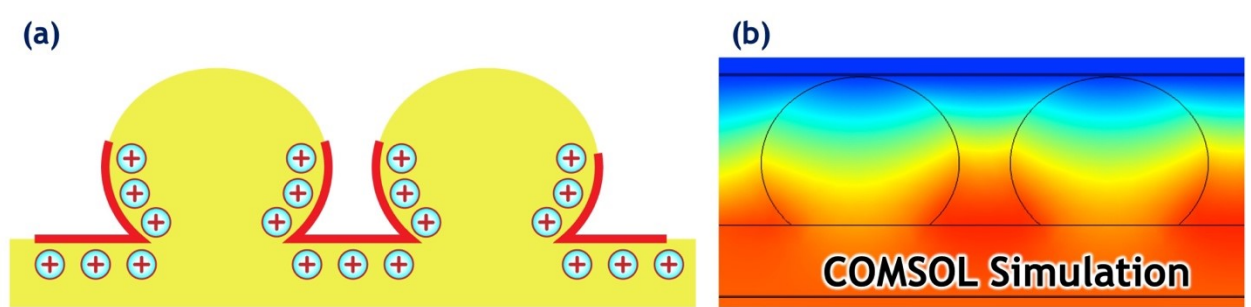

**Figure S4.** “Cubital fossa”-like storing effect.

**Table S1.** A comparison of output voltage signals among various human motion sensors

| Materials                 | Voltage (V) | Location of sensor | Reference |
|---------------------------|-------------|--------------------|-----------|
| Knitting graphene textile | 15          | Knee, slow running | 15        |
|                           | 18          | Knee, fast walking |           |

|                                                                                                                   |      |                                  |            |
|-------------------------------------------------------------------------------------------------------------------|------|----------------------------------|------------|
|                                                                                                                   | 20   | Knee, running                    |            |
| FEP, silicone/carbon black                                                                                        | 140  | Knee, walk                       | 16         |
|                                                                                                                   | 175  | Knee, high                       |            |
|                                                                                                                   | 60   | Knee, slight jump                |            |
|                                                                                                                   | 250  | Knee, high jump                  |            |
| PDMS/galinstan liquid metal nanoparticles                                                                         | 10   | Pressure sensing by hand-tapping | 17         |
| Pyramid PDMS, polyimide, gold, epidermis                                                                          | 70   | Finger, 60° bending              | 18         |
| PTFE, magnetic pole, copper                                                                                       | 0.4  | Finger, 90° bending              | 19         |
| ITO, FEP, PDMS, skin                                                                                              | 5    | Finger, bending                  | 20         |
| Carbon fiber, PVA, PDMS as Multifunctional Coaxial Energy Fiber                                                   | 0.6  | Finger, 90° bending              | 21         |
| Mxene ( $T_3C_2T_x$ ), polydimethylsiloxane, Copper/nickel textile                                                | 23   | Finger tapping                   | 22         |
|                                                                                                                   | 35   | Hand clapping                    |            |
|                                                                                                                   | 32   | Hammering                        |            |
| Ionogel from acrylic acid (AA) and 3-dimethyl (methacryloyloxyethyl) ammonium propane sulfonate (DMAPS), PDMS, PU | 3    | Elbow, 60° bending               | S2         |
|                                                                                                                   | 2    | Elbow, 90° bending               |            |
|                                                                                                                   | 0.75 | Elbow, 135° bending              |            |
| Microdome TPU, microdome PDMS                                                                                     | 15   | Finger, 1st joint bending        | This study |
|                                                                                                                   | 40   | Finger, 2nd joint bending        |            |
|                                                                                                                   | 60   | Finger-tapping                   |            |

**Video S1.** High stretching property of *c*-TPU (.mp4)

**Video S2.** *c*-TPU based TENG powering 120 LEDs (.mov)

**Video S3.** First joint bending signals (.mp4)

**Video S4.** Second joint bending signals (.mp4)

**Video S5.** Finger-tapping signals (.mp4)

**Video S6.** Softly hand-pressing signals (.mp4)

**Video S7.** Flexible TENG bending signals (.mp4)

**Video S8.** Flexible TENG twisting signals (.mp4)

## **References**

- S1 G. H. Nguyen Hoang, N. M. Chau, T. Van Le, V. T. Bui and T. T. H. La, *Polymer (Guildf)*., 2023, **285**, 126321.
- S2 L. Sun, S. Chen, Y. Guo, J. Song, L. Zhang, L. Xiao, Q. Guan and Z. You, *Nano Energy*, 2019, **63**, 103847.
